# Supplementary material
Source: PubMed Central journal article supplement (PMC5150660)
Supplement: jm6b01110_si_001.pdf [file jm6b01110_si_001.pdf]

SUPPORTING INFORMATION

# Measurement of ligand-target residence times by $^1\text{H}$ relaxation dispersion NMR spectroscopy

Thomas Moschen, Sarina Grutsch, Michael A. Juen, Christoph H. Wunderlich,  
Christoph Kreutz\* and Martin Tollinger\*

## TABLE OF CONTENTS:

|                                                                 |              |
|-----------------------------------------------------------------|--------------|
| <b>Details of the NMR pulse scheme</b>                          | <i>p.</i> S2 |
| <b>Figure S1.</b> 500 MHz relaxation dispersion data            | <i>p.</i> S3 |
| <b>Figure S2.</b> 500 MHz/600 MHz data fitting                  | <i>p.</i> S4 |
| <b>Figure S3.</b> L-tryptophan/BSA relaxation dispersion data   | <i>p.</i> S5 |
| <b>Figure S4.</b> One-dimensional relaxation dispersion spectra | <i>p.</i> S6 |
| <b>Table S1.</b> 500 MHz/600 MHz fitting results                | <i>p.</i> S7 |
| <b>References</b>                                               | <i>p.</i> S7 |

**DETAILS OF THE NMR PULSE SCHEME.** All solid pulses in the pulse scheme to measure  $^1\text{H}$  relaxation dispersion data (see Figure 1 of the main text) have flip angles of  $90^\circ$  (narrow) or  $180^\circ$  (wide), applied with phase  $x$  unless indicated otherwise. The two pulses flanking the last  $180^\circ$  pulse in the WATERGATE solvent suppression scheme<sup>1</sup> are water selective  $90^\circ$  rectangular flip-back pulses with a field strength of 0.16 kHz (500 MHz spectrometer) and 0.18 kHz (600 MHz spectrometer). The phase cycling employed is  $\phi_1 = [y, -y]$ ,  $\phi_2 = [x, -x]$ ,  $\phi_3 = [y, -y]$ ,  $\phi_4 = [-y, y]$ ,  $\phi_5 = [-y, y]$ ,  $\phi_6 = [x, x, -x, -x]$ ,  $\phi_7 = 4[x], 4[y]$ ,  $\phi_8 = 4[-x], 4[-y]$  and  $\phi_{\text{rec}} = 2[x], 4[-x], 2[x]$ .<sup>2</sup> Gradient strengths in G/cm (durations in ms) are  $g_1 = 5.0$  (0.1),  $g_2 = 8.0$  (0.6),  $g_3 = 12.0$  (1.0). Relaxation dispersion data are recorded by varying the number of basic CPMG elements,  $n$ , within a fixed time,  $T_{\text{relax}}$  to sample different values of CPMG refocusing frequencies  $\nu_{\text{CPMG}} = 1/(4 \tau_{\text{CPMG}})$ , where  $2 \tau_{\text{CPMG}}$  is the time between successive refocusing pulses, along with a reference experiment where the CPMG element is omitted, as described.<sup>3</sup>

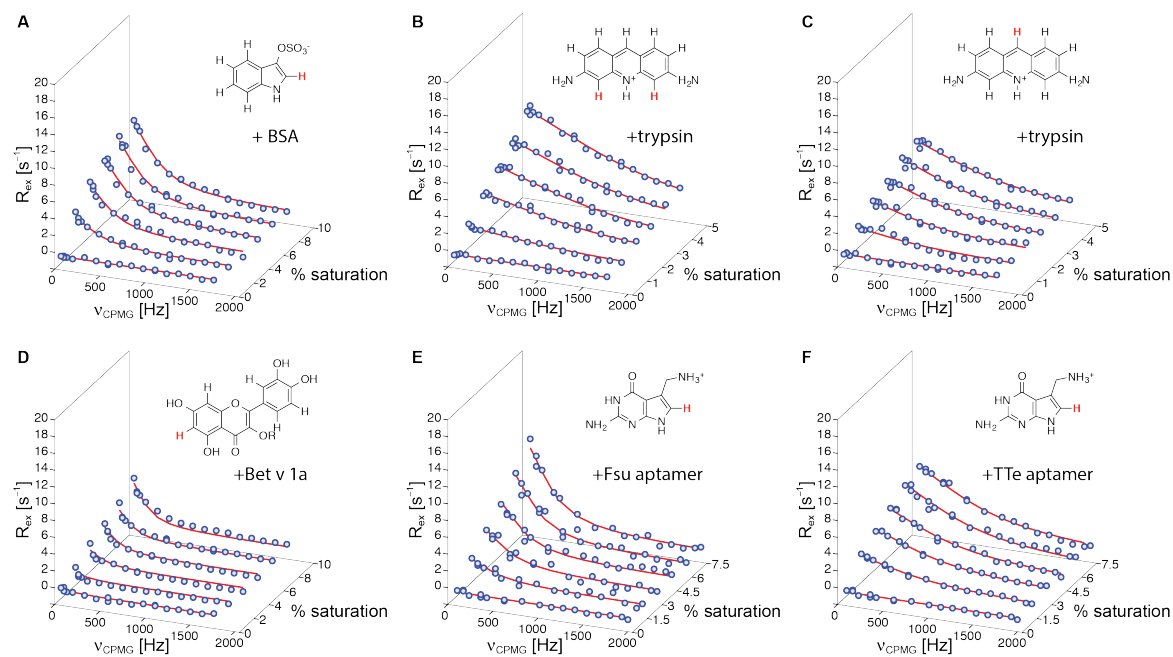

**FIGURE S1.** Ligand-detected  $^1\text{H}$ -CPMG relaxation dispersion data, recorded on an Agilent DirectDrive2 500 MHz spectrometer equipped with a room-temperature probe, for (A) indoxyl sulfate binding to BSA, (B) and (C) proflavin binding to bovine trypsin, (D) isoquercetin ( $R=\beta$ -D-glucoside) binding to Bet v 1a, (E) and (F) preQ<sub>1</sub> binding to aptamers from *F. nucleatum* and *Th. tengcongensis*. Data are shown for the protons indicated in red in the ligand structures (indoxyl sulfate:  $^1\text{H}$ -2, proflavin:  $^1\text{H}$ -4/5 and  $^1\text{H}$ -9, isoquercetin:  $^1\text{H}$ -6, preQ<sub>1</sub>:  $^1\text{H}$ -8). The exchange contributions  $R_{\text{ex}} = R_{2,\text{eff}} - R_{2,\text{eff}}(V_{\text{CPMG}} = \infty)$  to the relaxation dispersion profiles are shown. The solid lines are fits to the data.

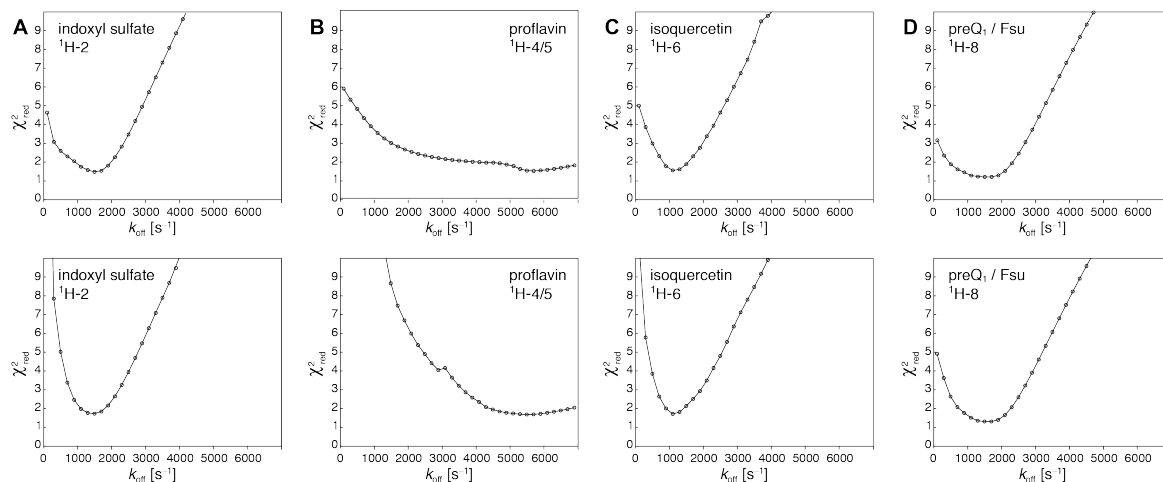

**FIGURE S2.** Variation of  $\chi^2_{\text{red}}$  from fits of  $^1\text{H}$ -CPMG relaxation dispersion as a function of off-rate,  $k_{\text{off}}$ . For calculation of  $\chi^2_{\text{red}}$ ,  $k_{\text{off}}$  was fixed at values between  $100 \text{ s}^{-1}$  and  $6900 \text{ s}^{-1}$  (in  $200 \text{ s}^{-1}$  intervals) and the two-site kinetic model described in the Experimental Section of the paper was fit to the experimental data.  $\chi^2_{\text{red}}$  variations are shown for (A) indoxyl sulfate ( $^1\text{H}$ -2), (B) proflavin ( $^1\text{H}$ -4/5), (C) isoquercetin ( $^1\text{H}$ -6) and (D) preQ<sub>1</sub> (binding to the Fsu aptamer), using only the 600 MHz data (top) or both 500 MHz and 600 MHz data (bottom) for analysis. Well-defined minima in the  $\chi^2_{\text{red}}$  vs.  $k_{\text{off}}$  profiles are found for (A), (C) and (D), while the broader minimum for faster off-rates in (B) is indicative for higher experimental uncertainties. In such cases, the performance of the experiment is enhanced by measuring RD data at two different magnetic field strengths.

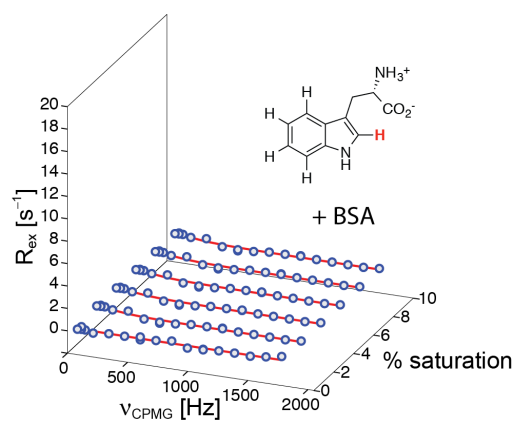

**FIGURE S3.** Ligand-detected  $^1\text{H}$ -CPMG relaxation dispersion data, recorded at 500 MHz, for L-tryptophan binding to BSA. Data are shown for the indole  $^1\text{H}$ -2 proton indicated in red. Experimental conditions: 50 mM potassium phosphate buffer (pH 5.8), 25 mM NaCl, 1 mM  $\text{NaN}_3$ , 100%  $\text{D}_2\text{O}$ , L-tryptophan: 2.0 mM, BSA: [0, 40, 80, 120, 160, 200  $\mu\text{M}$ ].

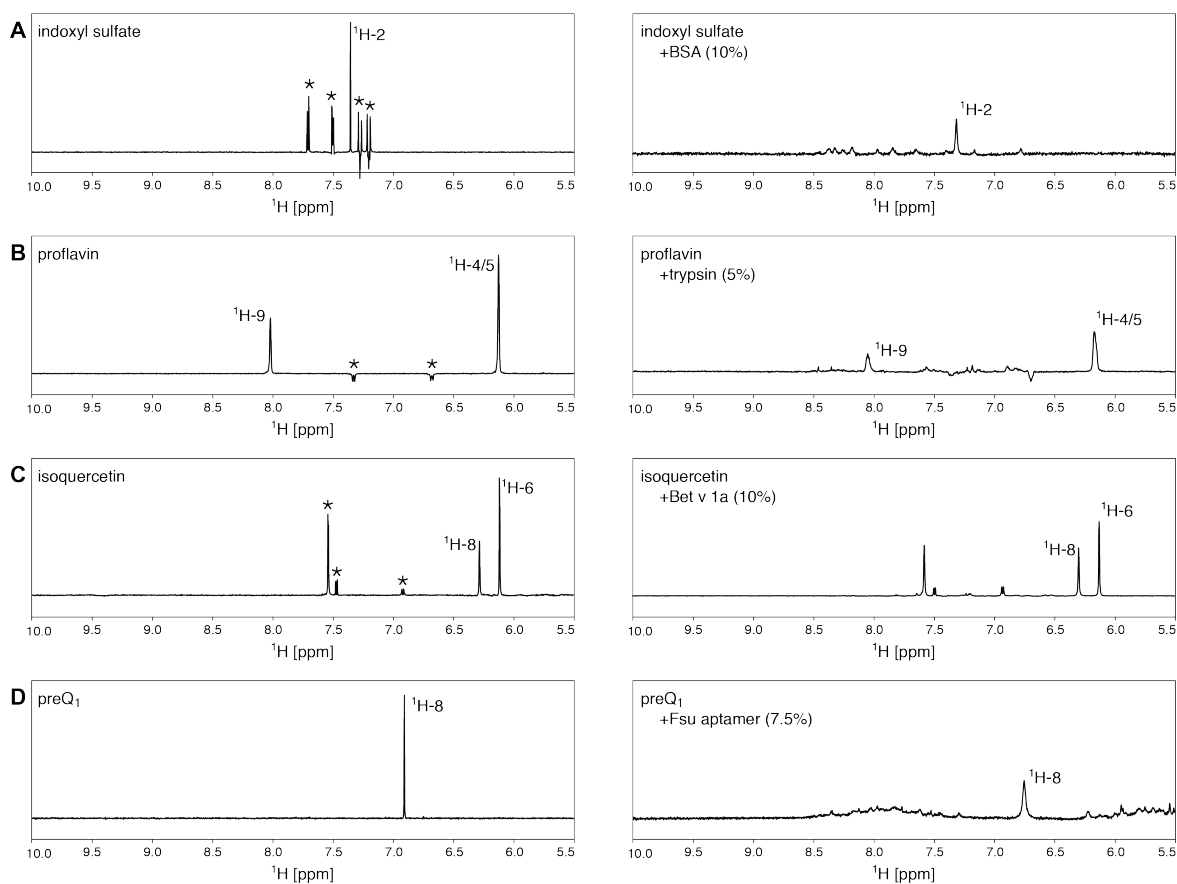

**FIGURE S4.** One-dimensional <sup>1</sup>H-CPMG relaxation dispersion spectra, recorded on a 600 MHz Bruker Avance II+ NMR spectrometer equipped with a prodigy cryogenic probe using the experimental scheme presented in this work. Low field portions (5.5 – 9.0 ppm) of spectra for the small-molecule ligands (A) indoxyl sulfate, (B) isoquercetin, (C) proflavin and (D) preQ<sub>1</sub> without receptor (left) and with the highest level of receptor saturation that was used (right) are shown. Assignments of ligand resonances that were used for <sup>1</sup>H-CPMG relaxation dispersion analysis are indicated; for isoquercetin and proflavin assignments were taken from the literature.<sup>4, 5</sup>  $T_{\text{filt}}$  was 60 ms for indoxyl sulfate, 80 ms for isoquercetin, 60 ms for proflavin and 40 ms for preQ<sub>1</sub>. Resonances marked by asterisks have scalar couplings > 1.5 Hz and were not used for analysis. These resonances can be distorted in spectra with transverse relaxation filtering because of interconversion between in-phase and anti-phase magnetization during  $T_{\text{filt}}$ .

| ligand            | resonance        | target      | $k_{\text{off}} [\text{s}^{-1}]^{\text{a)}$ | $k_{\text{off}} [\text{s}^{-1}]^{\text{b)}$ | $k_{\text{off}} [\text{s}^{-1}]^{\text{c)}$ |
|-------------------|------------------|-------------|---------------------------------------------|---------------------------------------------|---------------------------------------------|
| indoxyl sulfate   | $^1\text{H-2}$   | BSA         | $1500 \pm 200$                              | $1500 \pm 200$                              | $1500 \pm 100$                              |
| proflavin         | $^1\text{H-4/5}$ | trypsin     | $6000 \pm 1000$                             | $5400 \pm 700$                              | $5600 \pm 600$                              |
| proflavin         | $^1\text{H-9}$   | trypsin     | $3700 \pm 1000^{\text{d)}$                  | $5100 \pm 900$                              | $4400 \pm 600$                              |
| isoquercetin      | $^1\text{H-6}$   | Bet v 1a    | $1000 \pm 200$                              | $1000 \pm 100$                              | $1100 \pm 100$                              |
| preQ <sub>1</sub> | $^1\text{H-8}$   | Fsu aptamer | $1400 \pm 300$                              | $1600 \pm 200$                              | $1500 \pm 200$                              |
| preQ <sub>1</sub> | $^1\text{H-8}$   | TTe aptamer | $3900 \pm 300$                              | $4400 \pm 500$                              | $4000 \pm 300$                              |

**TABLE S1.** Off-rates,  $k_{\text{off}}$ , of ligand-target complexes obtained by fitting a) 500 MHz data, b) 600 MHz data and c) 500 and 600 MHz data simultaneously. d) For the proflavin  $^1\text{H-9}$  resonance at 500 MHz exchange contributions are small ( $R_{\text{ex}}$  below  $7 \text{ s}^{-1}$  at 5% saturation with trypsin, Figure S1).

## REFERENCES

1. Piotto, M.; Saudek, V.; Sklenar, V. Gradient-tailored excitation for single-quantum NMR spectroscopy of aqueous solutions. *J. Biomol. NMR* **1992**, *2*, 661-665.
2. Yip, G. N.; Zuiderweg, E. R. A phase cycle scheme that significantly suppresses offset-dependent artifacts in the  $R_2$ -CPMG  $^{15}\text{N}$  relaxation experiment. *J. Magn. Reson.* **2004**, *171*, 25-36.
3. Mulder, F. A.; Skrynnikov, N. R.; Hon, B.; Dahlquist, F. W.; Kay, L. E. Measurement of slow (micros-ms) time scale dynamics in protein side chains by  $^{15}\text{N}$  relaxation dispersion NMR spectroscopy: application to Asn and Gln residues in a cavity mutant of T4 lysozyme. *J. Am. Chem. Soc.* **2001**, *123*, 967-975.
4. Napolitano, J. G.; Lankin, D. C.; Chen, S. N.; Pauli, G. F. Complete  $^1\text{H}$  NMR spectral analysis of ten chemical markers of Ginkgo biloba. *Magn. Reson. Chem.* **2012**, *50*, 569-575.
5. Benchabane, Y.; Boyer, G.; Faure, R.  $^1\text{H}$  and  $^{13}\text{C}$  NMR signal assignments of some new N,N'-diacyl proflavine derivatives. *Magn. Reson. Chem.* **2009**, *47*, 706-710.

3050 Spruce Street, Saint Louis, MO 63103, USA

Website: www.sigmaaldrich.com

Email USA: techserv@sial.com

Outside USA: eurtechserv@sial.com

## Certificate of Analysis

Product Name:

Bovine serum albumin - lyophilized powder, crystallized, ≥98.0% (GE)

**Product Number:** 05470  
**Batch Number:** SLBK8105V  
**Brand:** SIGMA  
**CAS Number:** 9048-46-8  
**MDL Number:** MFCD00130384  
**Storage Temperature:** Store at 2 - 8 °C  
**Quality Release Date:** 07 NOV 2014  
**Recommended Retest Date:** NOV 2019

| Test                       | Specification          | Result        |
|----------------------------|------------------------|---------------|
| Appearance (Color)         | White to Off-White     | Off-White     |
| Appearance (Form)          | Powder                 | Powder        |
| Solubility (Color)         | Faint Yellow to Yellow | Faint Yellow  |
| Solubility (Turbidity)     | Clear to Slightly Hazy | Slightly Hazy |
| 50 mg/ml, H <sub>2</sub> O |                        |               |
| Water (by Karl Fischer)    | ≤ 8 %                  | 7 %           |
| Agarose Electrophoresis    | ≥ 98 %                 | 100 %         |
| Zinc (Zn)                  | ≤ 10 ppm               | < 10 ppm      |
| Copper (Cu)                | ≤ 20 ppm               | 9 ppm         |
| Iron (Fe)                  | ≤ 20 ppm               | < 5 ppm       |
| Nickel (Ni)                | ≤ 5 ppm                | < 5 ppm       |
| Cadmium (Cd)               | ≤ 5 ppm                | < 5 ppm       |
| Chromium (Cr)              | ≤ 100 ppm              | < 5 ppm       |
| Calcium (Ca)               | ≤ 500 ppm              | < 100 ppm     |
| Cobalt (Co)                | ≤ 5 ppm                | < 5 ppm       |
| Potassium (K)              | ≤ 50 ppm               | 28 ppm        |
| PPM Magnesium              | ≤ 500                  | < 100         |
| PPM Manganese              | ≤ 5                    | < 5           |
| PPM Lead                   | ≤ 5                    | < 5           |
| Sulfate (SO <sub>4</sub> ) | —                      |               |
| < or = 1000 ppm            |                        |               |
| Chloride (Cl)              | —                      |               |
| < or = 2000 ppm            |                        |               |

Sigma-Aldrich warrants, that at the time of the quality release or subsequent retest date this product conformed to the information contained in this publication. The current Specification sheet may be available at Sigma-Aldrich.com. For further inquiries, please contact Technical Service. Purchaser must determine the suitability of the product for its particular use. See reverse side of invoice or packing slip for additional terms and conditions of sale.



3050 Spruce Street, Saint Louis, MO 63103, USA

Website: [www.sigmaaldrich.com](http://www.sigmaaldrich.com)Email USA: [techserv@sial.com](mailto:techserv@sial.com)Outside USA: [eurtechserv@sial.com](mailto:eurtechserv@sial.com)

## Certificate of Analysis

Product Number: 05470  
Batch Number: SLBK8105V

| Test         | Specification | Result     |
|--------------|---------------|------------|
| Sodium (ICP) | ≤ 7000 ppm    | < 7000 ppm |



Rodney Burbach, Manager  
Analytical Services  
St. Louis, Missouri US

Sigma-Aldrich warrants, that at the time of the quality release or subsequent retest date this product conformed to the information contained in this publication. The current Specification sheet may be available at [Sigma-Aldrich.com](http://Sigma-Aldrich.com). For further inquiries, please contact Technical Service. Purchaser must determine the suitability of the product for its particular use. See reverse side of invoice or packing slip for additional terms and conditions of sale.

3050 Spruce Street, Saint Louis, MO 63103, USA

Website: [www.sigmaaldrich.com](http://www.sigmaaldrich.com)Email USA: [techserv@sial.com](mailto:techserv@sial.com)Outside USA: [eurtechserv@sial.com](mailto:eurtechserv@sial.com)

## Certificate of Analysis

Product Name:

Trypsin from bovine pancreas - Type XI, lyophilized powder,  $\geq 6,000$  BAEE units/mg protein

**Product Number:** T1005  
**Batch Number:** SLBK8241V  
**Brand:** SIGMA  
**CAS Number:** 9002-07-7  
**MDL Number:** MFCD00082094  
**Storage Temperature:** Store at -20 °C  
**Quality Release Date:** 04 SEP 2014

| Test                                                                                                                                                 | Specification | Result |
|------------------------------------------------------------------------------------------------------------------------------------------------------|---------------|--------|
| % Protein (UV)                                                                                                                                       | 90 - 100      | 100    |
| BAEE units/mg protein                                                                                                                                | $\geq 6000$   | 8643   |
| Unit Definition: One BAEE unit will produce a delta A253 of 0.001 per minute in a reaction volume of 3.2 ml at pH 7.6 at 25 deg C. (1 cm light path) |               |        |
| Chymotrypsin BTEE units/mg protein                                                                                                                   | $\leq 0.1$    | 0.0    |



Rodney Burbach, Manager  
Analytical Services  
St. Louis, Missouri US

Sigma-Aldrich warrants, that at the time of the quality release or subsequent retest date this product conformed to the information contained in this publication. The current Specification sheet may be available at [Sigma-Aldrich.com](http://Sigma-Aldrich.com). For further inquiries, please contact Technical Service. Purchaser must determine the suitability of the product for its particular use. See reverse side of invoice or packing slip for additional terms and conditions of sale.

## Certificate of Analysis

**Product Name:** INDOXYL SULFATE POTASSIUM SALT  
-  
**Product Number:** I3875  
**Batch Number:** BCBN8349V  
**Brand:** Aldrich  
**CAS Number:** 2642-37-7  
**Formula:** C<sub>8</sub>H<sub>6</sub>NO<sub>4</sub>SK  
**Formula Weight:** 251.30  
**Storage Temperature:** -20 C  
**Quality Release Date:** 24 SEP 2014  
**Recommended Retest Date:** SEP 2016

| TEST                   | SPECIFICATION                          | RESULT                    |
|------------------------|----------------------------------------|---------------------------|
| APPEARANCE (COLOR)     | WHITE TO YELLOW AND FAINT GREY TO GREY | WHITE                     |
| APPEARANCE (FORM)      | POWDER OR CRYSTALS                     | CRYSTALS                  |
| PURITY (TLC AREA %)    | ≥98 %                                  | 100.0 %                   |
| SOLUBILITY (COLOR)     | COLORLESS TO YELLOW-GREEN              | LIGHT GREENISH-YELLOW     |
| SOLUBILITY (TURBIDITY) | CLEAR TO HAZY                          | CLEAR (<3.5 NTU)          |
| SOLUBILITY (METHOD)    | 50MG/ML IN WATER                       | 50MG/ML IN WATER          |
| WATER                  | REPORT RESULT                          | 0.16 %                    |
| CARBON CONTENT         | 37.3 - 39.2 % (ANHYDROUS BASIS)        | 38.02 % (ANYHDROUS BASIS) |
| NITROGEN CONTENT       | 5.3 - 5.9 % (ANHYDROUS BASIS)          | 5.56 % (ANYHDROUS BASIS)  |
| INFRARED SPECTRUM      | CONFORMS TO STRUCTURE                  | CONFORMS                  |



Dr. Claudia Geitner  
Manager Quality Control  
Buchs, Switzerland

Sigma-Aldrich warrants that at the time of the quality release or subsequent retest date this product conformed to the information contained in this publication. The current specification sheet may be available at Sigma-Aldrich.com. For further inquiries, please contact Technical Service. Purchaser must determine the suitability of the product for its particular use. See reverse side of invoice or packing slip for additional terms and conditions of sale.

# Certificate of Analysis

SIGMA-ALDRICH

**Product Name** 3,6-Diaminoacridine hydrochloride,  
Dye content 95 %  
**Product Number** 131105  
**Product Brand** SIAL  
**CAS Number** 952-23-8  
**Molecular Formula** C<sub>13</sub>H<sub>11</sub>N<sub>3</sub> · HCl  
**Molecular Weight** 245.71

| TEST                                       | SPECIFICATION                                                                               | LOT 16806CBV RESULTS                                   |
|--------------------------------------------|---------------------------------------------------------------------------------------------|--------------------------------------------------------|
| <b>APPEARANCE</b>                          | DARK ORANGE TO ORANGE-BROWN POWDER                                                          | DARK ORANGE POWDER                                     |
| <b>INFRARED SPECTRUM</b>                   | CONFORMS TO STRUCTURE.                                                                      | CONFORMS TO STRUCTURE.                                 |
| <b>UV-VISIBLE SPECTRUM</b>                 | IN ACIDIFIED METHANOL<br>E455(+/-3)NM = 44,000 (MINIMUM)<br>E260(+/-3)NM = 50,000 (MINIMUM) | 0.005G/L, MEOH<br>E457NM= 47,900<br>E260NM= 54,200     |
| <b>ELEMENTAL ANALYSIS</b>                  | CARBON 59.7%-67.3%<br>NITROGEN 15.9%-18.1%                                                  | CARBON 60.23%<br>NITROGEN 15.92%                       |
| <b>TITRATION</b>                           | REPORT % CL (WITH SILVER NITRATE)                                                           | 107.7% (WITH SILVER NITRATE)                           |
| <b>HIGH PRESSURE LIQUID CHROMATOGRAPHY</b> | 94.0% (MINIMUM)                                                                             | 96.3%                                                  |
| <b>SOLUBILITY</b>                          | 1 MG/ML, H <sub>2</sub> O; CLEAR, ORANGE TO BROWN                                           | 1 MG/ML, H <sub>2</sub> O; CLEAR ORANGE-BROWN SOLUTION |
| <b>QUALITY CONTROL</b>                     |                                                                                             | APRIL 2003                                             |
| <b>ACCEPTANCE DATE</b>                     |                                                                                             |                                                        |



Barbara Rajzer, Supervisor  
Quality Control  
Milwaukee, Wisconsin USA

## Certificate of Analysis

**Product Name:** QUERCETIN 3-β-D-GLUCOSIDE  
>= 90 % HPLC  
**Product Number:** 17793  
**Batch Number:** BCBP4835V  
**Brand:** Sigma  
**CAS Number:** 482-35-9  
**Formula:** C<sub>21</sub>H<sub>20</sub>O<sub>12</sub>  
**Formula Weight:** 464.38  
**Storage Temperature:** -20 C  
**Quality Release Date:** 05 FEB 2015

| TEST                 | SPECIFICATION                        | RESULT                |
|----------------------|--------------------------------------|-----------------------|
| APPEARANCE (COLOR)   | LIGHT YELLOW TO DEEP GREENISH-YELLOW | LIGHT GREENISH-YELLOW |
| APPEARANCE (FORM)    | POWDER                               | POWDER                |
| PURITY (HPLC AREA %) | ≥ 90.0 %                             | 92.1 %                |
| MELTING POINT (DEC.) | 215 - 219 C                          | 219 C                 |
| INFRARED SPECTRUM    | CONFORMS TO STRUCTURE                | CONFORMS              |



Dr. Claudia Geitner  
Manager Quality Control  
Buchs, Switzerland

Sigma-Aldrich warrants that at the time of the quality release or subsequent retest date this product conformed to the information contained in this publication. The current specification sheet may be available at Sigma-Aldrich.com. For further inquiries, please contact Technical Service. Purchaser must determine the suitability of the product for its particular use. See reverse side of invoice or packing slip for additional terms and conditions of sale.

3050 Spruce Street, Saint Louis, MO 63103, USA

Website: www.sigmaaldrich.com

Email USA: techserv@sial.com

Outside USA: eurtechserv@sial.com

## Certificate of Analysis

Product Name:

PreQ1 dihydrochloride - ≥98% (HPLC)

**Product Number:** SML0807  
**Batch Number:** 123M4721V  
**Brand:** SIGMA  
**CAS Number:** 86694-45-3  
**Formula:** C<sub>7</sub>H<sub>9</sub>N<sub>5</sub>O · 2HCl  
**Formula Weight:** 252.1 g/mol  
**Storage Temperature:** Store at 2 - 8 °C  
**Quality Release Date:** 25 FEB 2014

| Test                                                                         | Specification        | Result    |
|------------------------------------------------------------------------------|----------------------|-----------|
| Appearance (Color)                                                           | White to Light Brown | Beige     |
| Appearance (Form)                                                            | Powder               | Powder    |
| Elemental Composition<br>C <sub>7</sub> H <sub>9</sub> N <sub>5</sub> O·2HCl | Pass                 | Pass      |
| ELEMENTAL ANALYSIS X VALUE<br>H <sub>2</sub> O (moles)                       | 0.0 - 4.0            | 0.7       |
| Purity (HPLC)                                                                | ≥ 98 %               | 98 %      |
| Identity                                                                     | Confirmed            | Confirmed |



Brendan Nye, QC Supervisor  
Quality Control  
Natick, Massachusetts US

Sigma-Aldrich warrants, that at the time of the quality release or subsequent retest date this product conformed to the information contained in this publication. The current Specification sheet may be available at Sigma-Aldrich.com. For further inquiries, please contact Technical Service. Purchaser must determine the suitability of the product for its particular use. See reverse side of invoice or packing slip for additional terms and conditions of sale.

## Certificate of Analysis

**Product Name:** L-TRYPTOPHAN  
reagent grade, >= 98 % TLC  
**Product Number:** T0254  
**Batch Number:** BCBL3276V  
**Brand:** Sigma-Aldrich  
**CAS Number:** 73-22-3  
**Formula:** C<sub>11</sub>H<sub>12</sub>N<sub>2</sub>O<sub>2</sub>  
**Formula Weight:** 204.23  
**Quality Release Date:** 19 JUN 2013  
**Recommended Retest Date:** MAY 2017

| TEST                     | SPECIFICATION                     | RESULT                            |
|--------------------------|-----------------------------------|-----------------------------------|
| APPEARANCE (COLOR)       | WHITE TO OFF-WHITE                | WHITE                             |
| APPEARANCE (FORM)        | POWDER                            | POWDER                            |
| PURITY (TLC AREA %)      | ≥98 %                             | 100.0 %                           |
| SPECIFIC ROTATION (20/D) | -29.4 TO -32.8 DEG                | -31.2 DEGREES                     |
| CONCENTRATION            | C=1 IN WATER                      | C=1 IN WATER                      |
| SOLUBILITY (COLOR)       | COLORLESS TO YELLOW               | ALMOST COLORLESS                  |
| SOLUBILITY (TURBIDITY)   | CLEAR (< 3.5 NTU)                 | CLEAR (<3.5 NTU)                  |
| SOLUBILITY (METHOD)      | 50MG/ML IN 0.5M HYDROCHLORIC ACID | 50MG/ML IN 0.5M HYDROCHLORIC ACID |
| CARBON CONTENT           | 63.2 TO 66.0 %                    | 64.5 %                            |
| NITROGEN CONTENT         | 13.3 TO 14.1 %                    | 13.7 %                            |
| INFRARED SPECTRUM        | CONFORMS TO STRUCTURE             | CONFORMS                          |



Dr. Claudia Geitner  
Manager Quality Control  
Buchs, Switzerland

Sigma-Aldrich warrants that at the time of the quality release or subsequent retest date this product conformed to the information contained in this publication. The current specification sheet may be available at Sigma-Aldrich.com. For further inquiries, please contact Technical Service. Purchaser must determine the suitability of the product for its particular use. See reverse side of invoice or packing slip for additional terms and conditions of sale.
